# Supplementary material for: Low Mutation Burden in Ovarian Cancer May Limit the Utility of Neoantigen-Targeted Vaccines
Source: PLoS One. 2016 May 18;11(5):e0155189. doi: 10.1371/journal.pone.0155189 (PMC4871527; doi:10.1371/journal.pone.0155189)
Supplement: S1 Table — Table showing each mutation that passed the filtering described in methods. (XLS) [file pone.0155189.s003.xls]

## Sheet: Good 2nd Val
Chr	position	Var Expressed	ref	var	result	type	gene	nt sub	UCSC accession	aa sub	ref aa	var aa
1	173201934	Yes	G	C	nonsynonymous	SNV	B4galt3	c.G61C	uc007dnq.2	A21P	A	P
1	23376856	Yes	T	G	nonsynonymous	SNV	Ogfrl1	c.A1127C	uc007amb.1	E376A	E	A
1	23376857	Yes	C	G	nonsynonymous	SNV	Ogfrl1	c.G1126C	uc007amb.1	E376A	E	A
1	151719884	Yes	C	T	nonsynonymous	SNV	Pla2g4a	c.G702A	uc007cxt.1	M234I	M	I
2	69083996	Yes	G	C	nonsynonymous	SNV	Abcb11	c.C3424G	uc008jya.1	H1142D	H	D
2	59186009	Yes	C	T	nonsynonymous	SNV	Pkp4	c.C3035T	uc008jtc.1	T1012I	T	I
3	107468489	Yes	G	A	stopgain	SNV	Ahcyl1	c.C841T	uc008qxi.1	Q281X	Q	X
3	151498471	Yes	G	C	nonsynonymous	SNV	Ptgfr	c.C363G	uc008rsn.1	C121W	C	W
4	117584706	Yes	C	A	nonsynonymous	SNV	Ipo13	c.G493T	uc008ujg.1	A165S	A	S
4	117817022	Yes	T	G	nonsynonymous	SNV	Kdm4a	c.A2440C	uc008uj2	S814R	S	R
4	71799603	Yes	G	A	nonsynonymous	SNV	Tle1	c.C1177T	uc008tif.2	H393Y	H	Y
4	134313266	Yes	A	G	nonsynonymous	SNV	Ldrap1	c.T331C	uc012dmx.1	S111P	S	P
4	3502241	Yes	-	A	frameshift	insertion	Tgs1	c.69_70insA	uc008rwi.2	Y23fs	Y	s
5	108332835	Yes	G	T	nonsynonymous	SNV	Rpl5	c.G475T	uc008ynh.2	V159F	V	F
5	69959711	Yes	G	T	stopgain	SNV	Guf1	c.G1636T	uc008xqm.1	E546X	E	X
6	72506228	Yes	C	A	nonsynonymous	SNV	Capg	c.C501A	uc009cit.1	F167L	F	L
6	87061548	Yes	C	T	nonsynonymous	SNV	D6Ertd527e	c.C698T	uc009ctc.2	P233L	P	L
6	12454164	Yes	G	C	nonsynonymous	SNV	Thsd7a	c.C990G	uc009ayj.2	S330R	S	R
8	49321310	Yes	G	C	nonsynonymous	SNV	Odz3	c.C6547G	uc009lrr.2	R2183G	R	G
9	59769599	Yes	A	G	nonsynonymous	SNV	Myo9a	c.A7180G	uc009q.2	M2394V	M	V
10	66688432	Yes	A	T	nonsynonymous	SNV	Jmjd1c	c.A3815T	uc011xf1	N1272I	N	I
10	23538921	Yes	A	C	nonsynonymous	SNV	1110021L09Rik	c.A851C	uc007eqa.2	Y284S	Y	S
10	53645348	Yes	T	G	nonsynonymous	SNV	Man1a	c.A1220C	uc007fbw.1	H407P	H	P
10	80266763	Yes	C	T	nonsynonymous	SNV	Sf3a2	c.C662T	uc011xiv.1	P221L	P	L
11	42133977	Yes	T	G	nonsynonymous	SNV	Gabra6	c.A66C	uc007imh.1	E22D	E	D
12	111887989	Yes	T	A	nonsynonymous	SNV	Dync1h1	c.T9263A	uc007o.1	V3088E	V	E
12	74382338	Yes	T	G	nonsynonymous	SNV	Trmt5	c.A1077C	uc007nwg.1	E359D	E	D
13	67023803	Yes	T	G	nonsynonymous	SNV	Mterfd1	c.A551C	uc007qzw.2	K184T	K	T
14	55684099	Yes	G	A	nonsynonymous	SNV	Zfhx2	c.C2741T	uc007tya.1	P914L	P	L
14	48015624	Yes	C	T	nonsynonymous	SNV	Dlgap5	c.G1619A	uc007tie.2	S540N	S	N
15	34069578	Yes	AAGTGCCACCG	-	frameshift	deletion	Mtdh	c.1595_1605del	uc007vlh.1	532_535del
15	85754581	Yes	G	C	nonsynonymous	SNV	Celsr1	c.C3187G	uc007xdu.1	P1063A	P	A
16	44218110	Yes	C	T	nonsynonymous	SNV	Gm608	c.C2839T	uc012afz.1	P947S	P	S
16	45972249	Yes	C	G	nonsynonymous	SNV	Plcxd2	c.G839C	uc007zje.2	G280A	G	A
17	35380029	Yes	T	C	nonsynonymous	SNV	Bat1a	c.T10C	uc008chc.2	S4P	S	P
17	36018610	Yes	C	T	nonsynonymous	SNV	Dhx16	c.C488T	uc008ciw.2	S163L	S	L
18	32405162	Yes	C	A	nonsynonymous	SNV	Ercc3	c.C541A	uc008eje.1	H181N	H	N
18	3419591	Yes	A	G	nonsynonymous	SNV	Cul2	c.A665G	uc008dya.2	E222G	E	G
18	38357063	Yes	T	A	nonsynonymous	SNV	Pcdh1	c.A200T	uc008ert.1	D67V	D	V
19	45016603	Yes	A	G	nonsynonymous	SNV	Fam178a	c.A1628G	uc008hqb.1	E543G	E	G
19	4746785	Yes	C	T	stopgain	SNV	Sb3	c.C5410T	uc008gan.1	Q1804X	Q	X
19	36927347	Yes	T	C	nonsynonymous	SNV	Tnks2	c.T689C	uc008hhu.2	L230S	L	S
1	14199004	No	T	C	nonsynonymous	SNV	Eya1	c.A1010G	uc007aiz.1	D337G	D	G
1	15700491	No	C	G	nonsynonymous	SNV	Kcnb2	c.C1505G	uc007aje.1	T502R	T	R
1	59201547	No	C	T	nonsynonymous	SNV	Mpp4	c.G427A	uc007bdj.1	D143N	D	N
1	39368785	No	C	T	nonsynonymous	SNV	Npas2	c.C463T	uc007atd.2	P155S	P	S
1	151704778	No	-	T	frameshift	insertion	Pla2g4a	c.1373_1374insA	uc007cxt.1	S458fs
2	40519309	No	C	A	nonsynonymous	SNV	Lrp1b	c.G12341T	uc008jon.1	G4114V	G	V
2	87865733	No	ATGCTAAACCCTTTG	-	nonframeshift	deletion	Olfr1161	c.853_867del	uc008k.2	285_289del
2	89431251	No	A	G	nonsynonymous	SNV	Olfr1246	c.T20C	uc008krr.2	V7A	V	A
2	111146662	No	A	G	nonsynonymous	SNV	Olfr1279	c.A305G	uc008lng.1	Q102R	Q	R
2	76551915	No	T	G	nonsynonymous	SNV	Ttn	c.A93545C	uc008kfn.1	N31182T	N	T
3	82814431	No	C	T	stopgain	SNV	Fgg	c.C583T	uc008d.1	R195X	R	X
4	95744010	No	C	-	frameshift	deletion	Cyp2j13	c.150delG	uc008ttf.1	L50fs
4	62832457	No	-	GGGCCTCCACCCGGC	nonframeshift	insertion	Kif12	c.180_181insGCCGGGTGGAGGCCC	uc008tfq.1	P60delinsPPGGGP
5	113523060	No	G	A	nonsynonymous	SNV	2900026A02Rik	c.C631T	uc008yua.2	R211W	R	W
5	102244970	No	A	G	nonsynonymous	SNV	Cds1	c.A1135G	uc008yio.1	R379G	R	G
5	113191741	No	C	T	nonsynonymous	SNV	Myo18b	c.G5804A	uc008ytr.2	R1935H	R	H
5	34351541	No	C	T	nonsynonymous	SNV	Poln	c.G2468A	uc008xbt.1	R823K	R	K
6	55918559	No	C	A	nonsynonymous	SNV	Ccdc129	c.C2270A	uc009cax.1	A757D	A	D
6	124255819	No	T	A	stopgain	SNV	Cd163	c.T51A	uc009dqn.2	C17X	C	X
6	119164889	No	CCA	-	nonframeshift	deletion	Dcp1b	c.747_749del	uc009dly.2	249_250del
6	141766368	No	T	A	nonsynonymous	SNV	Slco1a4	c.A1142T	uc009eos.1	K381M	K	M
6	66681441	No	ATAT	-	frameshift	deletion	Vmn1r37	c.56_59del	uc009cet.1	19_20del
7	64578972	No	A	T	nonsynonymous	SNV	Gabrg3	c.T316A	uc009hea.1	C106S	C	S
7	52880359	No	G	A	nonsynonymous	SNV	Izumo1	c.G479A	uc009gwh.1	R160Q	R	Q
7	22134992	No	A	G	nonsynonymous	SNV	Vmn1r128	c.A601G	uc012fdc.1	I201V	I	V
8	116229123	No	A	G	nonsynonymous	SNV	Adamts18	c.T1264C	uc012gle.1	Y422H	Y	H
8	77397653	No	AAG	-	nonframeshift	deletion	Isx	c.114_116del	uc012ggb.1	38_39del
9	49224769	No	G	A	nonsynonymous	SNV	Ankk1	c.C1217T	uc012gsw.1	T406M	T	M
9	20576799	No	G	C	nonsynonymous	SNV	Col5a3	c.C4604G	uc009ojf.1	P1535R	P	R
10	61533986	No	G	A	nonsynonymous	SNV	Ass1	c.G116A	uc007fgr.1	G39D	G	D
10	57698709	No	C	T	nonsynonymous	SNV	Gm4981	c.G430A	uc007fcw.1	A144T	A	T
11	66033509	No	C	G	nonsynonymous	SNV	Shisa6	c.G907C	uc007jlm.2	A303P	A	P
13	89271386	No	T	A	nonsynonymous	SNV	Edil3	c.T577A	uc007rjc.2	Y193N	Y	N
13	30843706	No	A	G	nonsynonymous	SNV	Irf4	c.A374G	uc007z.1	Y125C	Y	C
13	74296269	No	A	C	nonsynonymous	SNV	Slc9a3	c.A1064C	uc007res.1	N355T	N	T
14	69910736	No	G	A	nonsynonymous	SNV	D930020E02Rik	c.C125T	uc007umg.1	S42F	S	F
14	32097692	No	A	C	nonsynonymous	SNV	Dnahc1	c.T6712G	uc007sxk.2	F2238V	F	V
14	96551193	No	C	G	nonsynonymous	SNV	Klhl1	c.G1743C	uc007uuq.1	Q581H	Q	H
14	57080787	No	C	A	nonsynonymous	SNV	Rnf17	c.C1544A	uc007uca.1	P515Q	P	Q
15	57841250	No	C	T	nonsynonymous	SNV	Fam83a	c.C919T	uc011zta.1	P307S	P	S
16	95517464	No	T	A	nonsynonymous	SNV	Kcnj15	c.T337A	uc008abx.1	Y113N	Y	N
16	75556087	No	C	A	nonsynonymous	SNV	Lipi	c.G1106T	uc007zrn.1	G369V	G	V
16	89898407	No	C	T	nonsynonymous	SNV	Tiam1	c.G406A	uc007zvw.2	G136R	G	R
17	54113299	No	C	T	nonsynonymous	SNV	Sult1c1	c.G100A	uc008czv.1	E34K	E	K
17	18322098	No	A	-	frameshift	deletion	Vmn2r92	c.2539delA	uc009vaw.1	K847fs
19	13855225	No	T	C	nonsynonymous	SNV	Olfr1496	c.T122C	uc008gvz.2	V41A	V	A
X	103773254	No	A	G	nonsynonymous	SNV	Cysltr1	c.T964C	uc009ubt.1	S322P	S	P
X	104488859	No	C	T	stopgain	SNV	Gpr174	c.C937T	uc012hnr.1	Q313X	Q	X
X	97789436	No	G	C	nonsynonymous	SNV	P2ry4	c.C194G	uc009twc.1	A65G	A	G
X	163682761	No	T	G	nonsynonymous	SNV	Tlr8	c.A1024C	uc009uwy.1	N342H	N	H
